# Supplementary material
Source: publisher site journal article supplement (https://fr.pensoft.net/article/80211/download/suppl/33/)
Supplement: Supplementary file 1

**
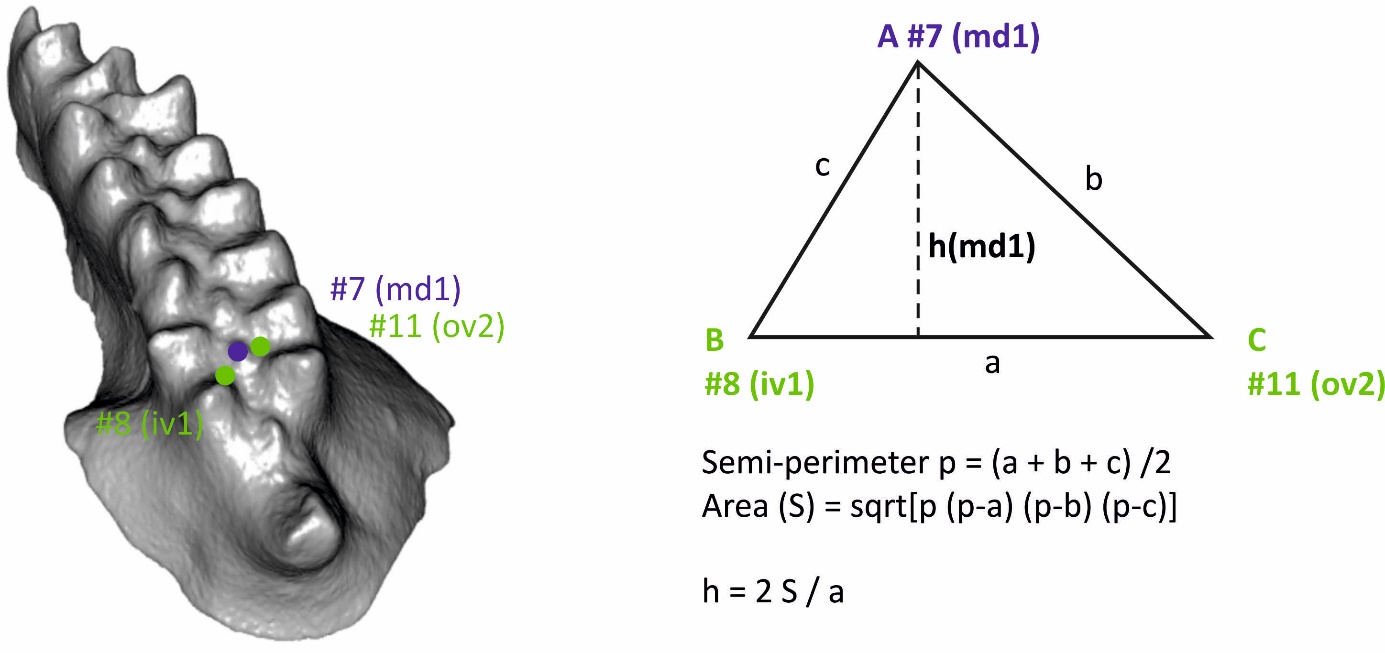
**

**Supplementary Figure 1**. Illustration of the calculation of md1 height by the geometry of the triangle iv1-md1-ov2.
